# Supplementary material for: Synthesis of the perovskite-type oxyfluoride AgTiO2F: an approach adopting the HSAB principle
Source: Royal Society of Chemistry journal article supplement (doi:10.1039/d0dt01518k), 2020-01-01
Supplement: d0dt01518k1.pdf [file d0dt01518k1.pdf]

**Electronic supplementary information**

**Synthesis of the perovskite-type oxyfluoride  $\text{AgTiO}_2\text{F}$ :  
an approach adopting the HSAB principle**

Yoshiyuki Inaguma,\* Ken Sugimoto, Koichiro Ueda

Department of Chemistry, Faculty of Science, Gakushuin University, 1-5-1 Toshima-ku,  
Tokyo 171-8588

\*Corresponding author: Yoshiyuki INAGUMA

E-mail: [yoshiyuki.inaguma@gakushuin.ac.jp](mailto:yoshiyuki.inaguma@gakushuin.ac.jp)

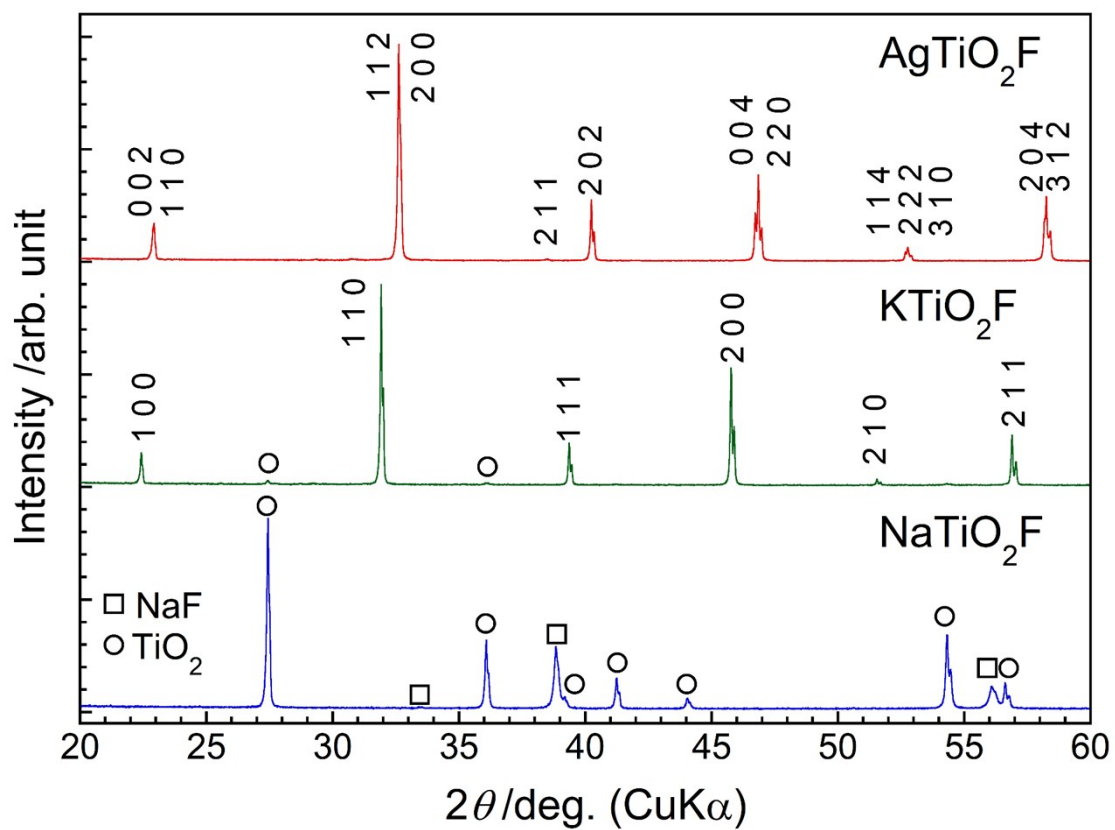

Fig. S1 Powder X-ray diffraction patterns of the obtained phases when synthesized at 1000 °C for 30 min under 4 GPa for ATiO<sub>2</sub>F (A = Na, K, Ag).

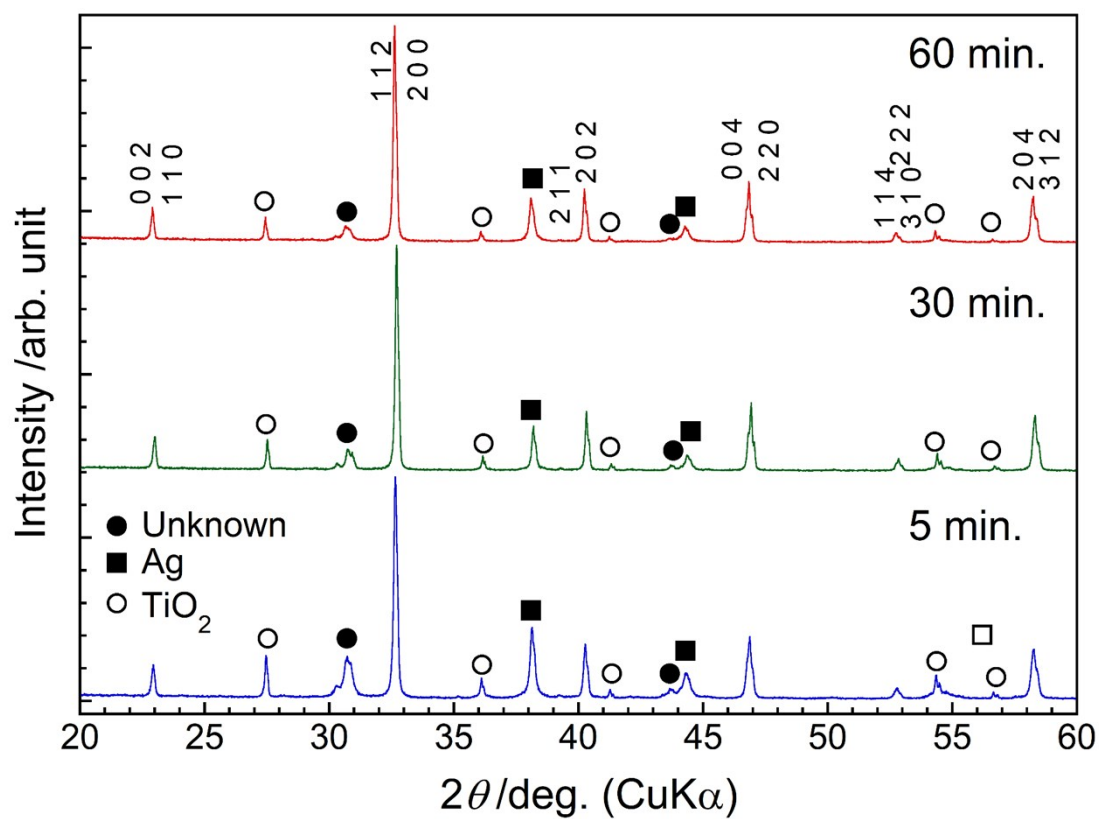

Fig. S2 Powder X-ray diffraction patterns of the obtained phases when synthesized at 500 °C for 5 min (a), 30 min (b), and 60 min (c) in a sealed tube for AgTiO<sub>2</sub>F.
